# Supplementary material
Source: Elsevier journal article supplement (https://www.sciencedirect.com/science/article/pii/S1138359314003815)
Supplement: mmc1 [file S1138359314003815:mmc1.docx]

**ADENDA**

**COMITÉ CIENTIFICO**

| Adalberto Serrano Cumplido |
| --- |
| Alfonso Barquilla García  Vivencio Barrios Alonso (investigador principal) |
| Ana de Santiago Nocito |
| Angel Díaz Rodríguez |
| Carlos Escobar Cervantes |
| Gustavo C. Rodríguez Roca |
| Jesús Vergara Martín |
| Jose Luis Llisterri Caro |
| Juan José Badimón Maestro |
| Miguel Angel Prieto Díaz |

**COORDINADORES AUTONÓMICOS**

ANDALUCIA (ANDALUCIA ORIENTAL): LISARDO GARCIA MATARIN

ANDALUCIA (ANDALUCIA OCCIDENTAL): EMILIO GARCIA CRIADO

ARAGON: SALVADOR LOU ARNAL

ASTURIAS: MIGUEL ANGEL PRIETO DIAZ

BALEARES: ANTONIO SALVA CERDA

CANARIAS: AGUSTÍN GONZALEZ SANCHEZ

CANTABRIA: GUILLERMO POMBO ALLES

CASTILLA LEON: ANGEL DIAZ RODRIGUEZ

CASTILLA LA MANCHA: FRANCISCO JAVIER ALONSO MORENO

CATALUÑA-1: PERE BEATO FERNANDEZ

CATALUÑA-2: TERESA RAMA MARTINEZ

EXTREMADURA: ALFONSO BARQUILLA GARCIA

GALICIA: SERGIO CINZA SANJURJO

MADRID-1: ALBERTO CALDERON MONTERO

MADRID-2: OLGA GARCIA VALLEJO

MURCIA: EDUARDO CARRASCO CARRASCO

NAVARRA: LUIS JOSE MENDO GINER

PAIS VASCO: ADALBERTO SERRANO CUMPLIDO

VALENCIANA: VICENTE PALLARES CARRATALA

**INVESTIGADORES**

| **ANDALUCIA (ANDALUCIA ORIENTAL)** | **INVESTIGADOR** |
| --- | --- |
|  | Alberto Soria Bonilla |
|  | Angel Dominguez |
|  | Antonio Jesus Rubio Dominguez |
|  | Antonio Sintas Nogales |
|  | David Amselem Garcia |
|  | Francisco Javier Rubio López |
|  | Isabel Moreno Gonzalez |
|  | Jeronimo Carrillo |
|  | Jesus Vergara Martin |
|  | Jose Antonio Lomeña Villalobos |
|  | Jose Antonio Perez Vargas |
|  | Jose Lorente Serna |
|  | Jose Luis Carrasco Martin |
|  | Jose Manuel Gordillo Montoya |
|  | Jose Manuel Ramirez Torres |
|  | Jose Mº Beltran Poveda |
|  | José Plaza Hernández |
|  | Jose Ramon Aldrich |
|  | Jose Ramon Boxo Cifuentes |
|  | Juan Antonio Gil Campoy |
|  | Juan Baron |
|  | Juan Carlos Aguirre Rodríguez |
|  | Juan Carlos Marti Canales |
|  | Juan Carlos Rodriguez Rodriguez |
|  | Juan José Abad Vivas Pérez |
|  | Juan Jose Florido Fajardo |
|  | Leovigildo Ginel Mendoza |
|  | Maria Cruz Rodriguez Matas |
|  | Maria Jose Cruz Rodriguez |
|  | Maria Jose Gomez Gonzalez |
|  | Maria Jose Hidalgo Fajardo |
|  | Miguel Angel Rodriguez Alcazar |
|  | Pablo Panero Hidalgo |
|  | Pedro García Pedreño |
|  | Pilar Torrealba Aranda |
|  | Ramón Domínguez de la Torre |
|  | Ricardo Alberola |
|  | Sergio Martinez |
|  | Virginia Bueno del Campo |
| **ANDALUCIA (ANDALUCIA OCCIDENTAL)** | **INVESTIGADOR** |
|  | Alfredo Ortíz Arjona |
|  | Antonio Hernandez Ruiz |
|  | Cristobal Prieto Cid |
|  | Enrique Jesus de Toro Torres |
|  | Enrique José Gamero de Luna |
|  | Enrique Martí Rioboo |
|  | Esperanza Loziaga González |
|  | Fernando Leiva Cepas |
|  | Fernando María Pérez Pérez |
|  | Francisco Manzano |
|  | Javier Benítez Ribero |
|  | Javier Ruiz Moruno |
|  | Jon Iñaki Esturo Alcane |
|  | José Ángel Blanco Leira |
|  | Jose Antonio Quintano Jimenez |
|  | José Escribano Serrano |
|  | Jose Pineda Morales |
|  | Juan Jose Garcia Gallego |
|  | Juana Maria Gonzalez Barranco |
|  | Lisimaco Salinas Duran |
|  | Luis Muñoz Olmo |
|  | Manuel María Ortaga Marlasca |
|  | Maria de los Angeles Ortega Osuna |
|  | Maria de los Reyes Martinez Guillen |
|  | Maritza Elizabeth Riofrio Laines |
|  | Pilar Bellanco Esteban |
|  | Rafael Puchol |
| **ARAGON** | **INVESTIGADOR** |
|  | Ángel González |
|  | Antonio Pablo Martinez Barseló |
|  | Arsenia Barredo Alloza |
|  | Concepción Bayod Calvo |
|  | Eva Trillo Calvo |
|  | Juan Antonio Peñalver Pardo |
|  | Julio González Algas |
|  | Raquel Regla Marín |
|  | Susana Larripa de la Natividad |
|  | Teresa Zumeta Fustero |
| **ASTURIAS** | **INVESTIGADOR** |
|  | Antonio Leandro Bousquets Toral |
|  | Belen González López |
|  | Juan Jesús García Fernández |
|  | Luis M. Viña Alonso |
|  | Margarita Alonso Fernández |
|  | María Asunción Simal Ordas |
|  | Maria Elena Cerrato Rodriguez |
|  | Pilar Niño García |
|  | Rodrigo Abad Rodríguez |
|  | Saul Suarez García |
| **BALEARES** | **INVESTIGADOR** |
|  | Ana Moyá Amengual |
|  | Antonia Borras Carreras |
|  | Antonia Moreno Gonzalez |
|  | Bartolomé Barceló Alemany |
|  | Carlos Pagán Pomar |
|  | Domingo Fernandez Lara |
|  | Fernando García Romanos |
|  | Jeronia Mesquida Estelrich |
|  | Joan Miguel Sampol Company |
|  | José Javier Moragues Barceló |
|  | José Manuel Valverde Rubio |
|  | Mª Rosa Lopez Escudero |
|  | Mateu Seguí-Díaz |
|  | Pedro Salas Bestard |
| **CANARIAS** | **INVESTIGADOR** |
|  | Antonia Rodríguez Hernández |
|  | Antonio Rico Revuelta |
|  | Beatriz Garcia Sanchez-Real |
|  | Begoña Vanessa Deniz Saavedra |
|  | Fernando Rubio Sevillano |
|  | Ignacio Javier Cova Diaz |
|  | Isabel Sanchez Garcia |
|  | Isidro Godoy Garcia |
|  | José Manuel Luis Hernandez |
|  | Pedro Jesús Martin Pérez |
|  | Rosa Monzon Rodriguez |
|  | Vicente Olmo Quintana |
| **CANTABRIA** | **INVESTIGADOR** |
|  | Alcibiades Segundo Diaz Vera |
|  | Alejandro Rojo Gutiérrez |
|  | Alicia Santos Urrutia |
|  | Alvaro Perez Martin |
|  | Ana González Pesquera |
|  | Angel Ibarra Corbillon |
|  | Borja Rivero Sierra |
|  | Carlos Cervero Sobrevela |
|  | E. Lidia Gutiérrez Fernández |
|  | Eduardo Gutiérrez Delgado |
|  | Fernando Andrés Mantecón |
|  | Fernando Quijano Terán |
|  | Francisca Gomez Molleda |
|  | Jesús Sainz Jiménez |
|  | Lourdes Prieto Redondo |
|  | Luis A. Sainz de Rozas Arpide |
|  | Luisa Alonso Rentería |
|  | Mª del Carmen Salvador Guerra |
|  | Mª José Agüeros Fernández |
|  | Mª Luisa Valcuende Mantilla |
|  | Mariano Rodríguez Porres |
|  | Marisol Piris Santamaría |
|  | Miguel Angel Ruiz Guerra |
|  | Rosa Grande Grande |
|  | Silvia Pardo del Olmo |
| **CASTILLA LEON** | **INVESTIGADOR** |
|  | Delio Vázquez Mallada |
|  | Enrique Arrieta Antón |
|  | Francisco Javier Garcia-Norros Herreros |
|  | Francisco Vicente Martínez Gracía |
|  | Javier Mediavilla Bravo |
|  | Jose Carlos Minguez Villar |
|  | Juan Carlos Verdes-Montenegro Atalaya |
|  | Omar Mahmoud Atoui |
|  | Serafin de Abajo Olea |
| **CASTILLA LA MANCHA** | **INVESTIGADOR** |
|  | Abel Cuellar de León |
|  | Alicia Fernandez de Peñaranda Cervantes |
|  | Ana Carmen Gil Adrados |
|  | Ana Maria de Santiago Nocito |
|  | Antonio Alonso Verdugo |
|  | Antonio González Cabrera |
|  | Beatriz Gomez Molina |
|  | Blanca Cordero García |
|  | Carlos Santos Altozano |
|  | Carmen García Bajo |
|  | Cristina de Castro Mesa |
|  | Francisca Molina Escribano |
|  | Guillermo Rico Garcia |
|  | Jaime Gonzalez Gonzalez |
|  | Javier Arribas Aguirregaviria |
|  | Javier Sánchez Holgado |
|  | Jose Ambrosio Torres Moraleda |
|  | José Manuel Comas Samper |
|  | Juan Antonio Divison Garrote |
|  | Juan Carlos Mendez-Cabezas Fuentes |
|  | Juan Jose Criado-Alvarez |
|  | Mª Jesus Almansa Martin |
|  | María García Palencia |
|  | María Luisa Maldonado Cordero |
|  | Miguel Angel Babiano Fernández |
|  | Miguel Laborda Peralta |
|  | Pedro Martinez Sotodosos |
|  | Pilar Sorrius Sitges |
|  | Raul Piedra Castro |
|  | Susana Arenas Sotelo |
|  | Vicente Herranz Catalán |
| **CATALUÑA (CATALUÑA-1 )** | **INVESTIGADOR** |
|  | Beatriz Jiménez Muñoz |
|  | Brenda Elizabeth Riesgo Escudero |
|  | Estrella Perez Vazquez |
|  | Gemma Rovira Marcelino |
|  | Ines Gil Gil |
|  | Mari Carmen Martínez Altarriba |
|  | Roberto Genique Martinez |
|  | Susana Elizabeth Riesgo |
| **CATALUÑA (CATALUÑA-2 )** | **INVESTIGADOR** |
|  | Marta D´Lacoste Farre |
|  | Montserrat Pimienta Escrihuela |
| **EXTREMADURA** | **INVESTIGADOR** |
|  | Amparo Botejara Sanz |
|  | Ana Moreno Moreno |
|  | Antonio Garcia Concellón |
|  | Bartolome Leal Correa |
|  | Dimas Igual Fraile |
|  | Elisa Simancas Muñoz |
|  | Felix Suarez Gonzalez |
|  | Francisco Carramiñana Barrera |
|  | Francisco Javier Felix Redondo |
|  | Francisco Javier Sanchez Vega |
|  | Francisco Javier Zaballos Sanchez |
|  | Guadalupe Nieto Barco |
|  | Ignacio Araujo Ramos |
|  | Jacinto Espinosa García |
|  | Javier SierraTapia |
|  | Jesus Cobaleda Polo |
|  | Jorge de Nicolas Jimenez |
|  | Jose Ignacio Prieto Romo |
|  | Jose Maria Fernandez Toro |
|  | José Polo García |
|  | Juan Jose Torres Vazquez |
|  | Leandro Fernandez Fernández |
|  | Maria Jesus Rangel Tarifa |
|  | Maria Jose Gamero Samino |
|  | Maria Jose Gomez Barquero |
|  | Maria Jose Hurtado Gomez |
|  | Miguel Angel de Santiago Rodriguez |
|  | Nieves Moreno Regidor |
|  | Remedios Serrano Gil |
|  | Vicente Caballero Pajares |
|  | Victoriano Chavero Carrasco |
| **GALICIA** | **INVESTIGADOR** |
|  | Alberto Del Álamo Alonso (Novoa Santos) |
|  | Alejandra Rey Rañal (San José) |
|  | Alejandro Rodriguez Gonzalez |
|  | Alfonso Patricio Novoa |
|  | Alicia Colmeiro Corral |
|  | Alicia Losada Zapatero |
|  | Ana Ines Garcia Palacio |
|  | Ana Mª Lopez de Viana |
|  | Ángel Luis Lado Llerena |
|  | Angeles Sardon Lorenzo |
|  | Antonio Calvo Guerrero |
|  | Beatriz Remuiñan Rodriguez |
|  | Carlos Pérez Pérez |
|  | Carlos Piñeiro Díaz |
|  | Carmen Lires Rodríguez |
|  | Carmen Pache Muiños |
|  | Cristina Nieto Carballo |
|  | Daniel Rey Aldana |
|  | David Bouza Álvarez (Ventorrillo) |
|  | Elena García del Río (Fontenla Maristany) |
|  | Enrique Nieto Pol (Concepción Arenal) |
|  | Fernando Padin Montoto |
|  | German Allut Vidal |
|  | Isabel Celemín Colomina |
|  | Isabel Rodriguez Perez |
|  | Isidoro Rivera Campos (Virxe da Peregrina) |
|  | José Carreira Arias |
|  | Jose Luís Vázquez Camino |
|  | José María López Campos |
|  | José Rodríguez Campos |
|  | Juana Antonia Fernandez Moreno |
|  | Julio Álvarez Fernández |
|  | Leopoldo García Méndez (C.S. Matamá) |
|  | Lucia Barreiro Casal |
|  | Mª Angelines Carballal Martinez |
|  | Mª del Mar Novo Carballal |
|  | Mª Isabel Díaz Pita (Fontenla Maristany) |
|  | Mª Luisa Jorge Gómez |
|  | Manuel Do Muiño Joga |
|  | Manuel González Gázquez |
|  | Manuel Portela Romero |
|  | Mar Díez Ponce (C.S. Cuba) |
|  | Margarita Cores Abalo |
|  | María Iglesias Otero |
|  | Otilia Rego Ojea |
|  | Pilar Alonso Álvarez |
|  | Portal González Lorenzo |
|  | Ricardo Garcia Sieiro |
|  | Rubén Blanco Rodríguez |
|  | Sara Pérez Meixeira |
|  | Serafin Tadeo Bartolome Perez |
| **MADRID (MADRID-1)** | **INVESTIGADOR** |
|  | Alfredo Avellaneda Fernández |
|  | Amelia Gonzalez Gamarra |
|  | Aurora Garcia Lerin |
|  | Carlos Escobar Cervantes |
|  | Elena Klusova |
|  | Elena Rodilla Rodilla |
|  | María del Mar Zamora Gómez |
|  | Miguel Muñoz Flores |
| **MADRID (MADRID-2)** | **INVESTIGADOR** |
|  | Alberto Galgo Nafría |
|  | Ana Belén López Herranz. |
|  | Ana Esther Manzanas González |
|  | Ángela Rodríguez de Cossío |
|  | Antonino Roman Martinez |
|  | Antonio Ruiz Garcia |
|  | Begoña Berriatua Ena |
|  | Celia Pecharroman Sacristan |
|  | Cristina Murillo Jelsbak |
|  | David Palacios Martínez |
|  | Elena Alarcón Cebrián |
|  | Elisa Muñiz Domínguez |
|  | Javier Cejudo |
|  | Julia Caballer Rodilla |
|  | Julio Antonio Heras Hitos |
|  | Loreto Vara de Andrés |
|  | Luis Gonzalez |
|  | Mª Carmen García Albiñana |
|  | Mª Cruz Díez Perez |
|  | Mª de la Soledad Araújo Luis |
|  | Mª del Pilar Moreno Cano |
|  | Mª Jose Piñero Acin |
|  | Mª Milagros González Béjar |
|  | Mª Paz Pérez Unanua |
|  | Manuel de Jesús Frías Vargas |
|  | Maria Carmen Belen Garcia Fortea |
|  | Maria Luisa Lopez Diaz Ufano |
|  | María Mestre de Juan |
|  | María Valdés Villar |
|  | Mercedes Ricote Belinchon |
|  | Mª Jesus Domingo |
|  | Mª Pilar Sainz Camuñas |
|  | Paula Hernanz Lopez |
|  | Pedro Pablo Iglesias Dorado |
|  | Pilar Gutiérrez |
|  | Virginia Lasso Oria |
| **MURCIA** | **INVESTIGADOR** |
|  | Ana María Ballesteros Pérez |
|  | Ana Ruiz Andreu |
|  | Armando Santo Gonzalez |
|  | Esther Uceda Gómez |
|  | Juan Castillo Meroño |
|  | Rafael Rios de Moya Angeler |
|  | Vicente Llorca Bueno |
| **NAVARRA** | **NAVARRA** |
|  | Laura Sánchez Iñigo |
| **PAIS VASCO** | **INVESTIGADOR** |
|  | Alfredo Garmilla Gamarra |
|  | Amaia Ibargurren Alonso |
|  | Ana Echebarría Ituiño |
|  | Ana Menoyo Olabarrieta |
|  | Asunción Olagorta de Prado |
|  | Begoña Vicandi Urbaneda |
|  | Cristina Diez Gomez |
|  | Dolores Estraviz Vidal |
|  | Gabriel Hernandez Iñarra |
|  | Garazi Ibarluzea |
|  | Javier del Río Fernández |
|  | Javier Uría Ibargüengoitia |
|  | Jon Argote Atxalandabaso |
|  | Jose Antonio Quindimil Vazquez |
|  | Jose Felix Zuazagoitia Nubla |
|  | José Javier Antón Ortega |
|  | Juan Carlos Caballero García |
|  | Julián Bajo García |
|  | Lina Marcela Serna D´Leon |
|  | Maria Dolores Martínez González |
|  | Maria Rosario Virtus Iñurrieta |
|  | Noemi Sanchez Jimenez |
|  | Rafael Alonso Matía |
|  | Rafael Olalde Quintana |
| **C. VALENCIANA** | **INVESTIGADOR** |
|  | Adela Sánchez Moya |
|  | Adela Tomás Gironés |
|  | Alba García Porras |
|  | Alejandro Salanova Peñalba |
|  | Alfredo Albalat Miralles |
|  | Alicia Tamarit Latre |
|  | Amparo Tercero Fuster |
|  | Ana Casado Crespo |
|  | Ana Casorran Martinez |
|  | Ana Seoane Novás |
|  | Andrés Vicente Genovés Esplugues |
|  | Ángela García González |
|  | Antonio Francés Camus |
|  | Antonio Lorenzo Piqueres |
|  | Antonio Masia Alegre |
|  | Antonio Tramontano |
|  | Ariadna Cuco Alberola |
|  | Aurora Rodil Martinez |
|  | Belén Persiva Saura |
|  | Carlos Lluna Gasco |
|  | Carmen Barcelo Dupuy |
|  | Carmen Bueno Selles |
|  | Elena Benages Vicente |
|  | Elia M. Ortuño Pascual |
|  | Elisabet Serisa Blasco |
|  | Enrique Beltran Llicer |
|  | Enrique Hermida Campa |
|  | Enrique Peña Forcada |
|  | Esther Ferrer Alcaraz |
|  | Eufrosina Santos Alonso |
|  | Eva Carrascosa García |
|  | Eva María Rodríguez Castro |
|  | Eva Sánchez Fresquet |
|  | Fernando Mª Navarro Ros |
|  | Francisca Martinez Ques |
|  | Francisco Javier Sanz García |
|  | Francisco Jose Martinez Egea |
|  | Francisco Valls Roca |
|  | Irene Bonig Trigueros |
|  | Irina Jara Calabuig |
|  | Jaume Piera Olives |
|  | Javier Ballester Ortí |
|  | Javier Llopis Vicent |
|  | Javier Precioso Costa |
|  | Joana Alcaraz i Boronat |
|  | John Gutierrez |
|  | José Luis Llisterri Caro |
|  | José Mª Tirado Moliner |
|  | José María Breva Sanchis |
|  | Jose Ramon Ramos |
|  | Juan A. Contreras Torres |
|  | Juan Manuel Pilar Claramonte |
|  | Laura Balada Matamoros |
|  | Leandro Quiles Martinez |
|  | Lidon Pla Meseguer |
|  | Liliana Tarancon Gozalbo |
|  | Lorenzo Bertomeu Durá |
|  | Lorenzo Fácila Rubio |
|  | Luis Richard Rodriguez |
|  | M. Ángeles Viñas Gimeno |
|  | Mª Asuncion Palomar Marin |
|  | Mª Carmen Sisternas Chust |
|  | Mª del Mar Barreda Royo |
|  | Mª Dolores Aicart Bort |
|  | Mª Jesús Larré Muñoz |
|  | Magda Martí Llinares |
|  | Magdalena Martínez Grau |
|  | Manuela Vicente de Cañizares |
|  | María Amparo Anton Peinado |
|  | Maria Carmen Botella Garcia |
|  | Maria Consol Novoa Gomez |
|  | María Díaz Gimeno |
|  | María Eugenia Alegre Romero |
|  | María Jesús Sancho Llopis |
|  | Maria Lledó Viciano Fabregat |
|  | María Salud Estrada Pasto |
|  | Maria Serra Bartual |
|  | Maribel Gargallo |
|  | Marta Ferrer Royo |
|  | Miguel Montagud Moncho |
|  | Montse Fernández López |
|  | Montserrat Ferrer Maña |
|  | Natividad Vázquez Gómez |
|  | Nel·lo Monfort |
|  | Nieves Aguilar Gómez |
|  | Patricia de Labaig Ramos |
|  | Patricia Gilabert Machordom |
|  | Pedro Antonio Medina Cano |
|  | Rafael Durá Belinchón |
|  | Rafael Molina Mira |
|  | Raquel Navarro Hernández |
|  | Ricardo Salcedo Casabán |
|  | Rosa Ana Valero Valero |
|  | Rosa Latorre Santos |
|  | Rosana Ruiz Mompo |
|  | Rosenda Cañizares Huget |
|  | Salvador Martinez Parra |
|  | Sofía Bauer Izquierdo |
|  | Susana Bercial Climent |
|  | Teresa Amoros Barber |
|  | Tomás Sánchez Ruiz |
|  | Trinidad Jiménez López |
|  | Vanessa Aznar Tortonda |
|  | Vanessa Dominguez Úbeda |
|  | Vicente Gasull Molinera |
|  | Vicente Giner Galvañ |
|  | Vicente Pascual Fuster |
|  | Yoshio Antoian Silvero |
